# Supplementary material for: Neonatal gut and respiratory microbiota: coordinated development through time and space
Source: Springer Nature journal article supplement (doi:10.1186/s40168-018-0566-5), 2018-10-26
Supplement: 40168_2018_566_MOESM1_ESM.pdf [file 40168_2018_566_MOESM1_ESM.pdf]

## Supplemental Figure 1

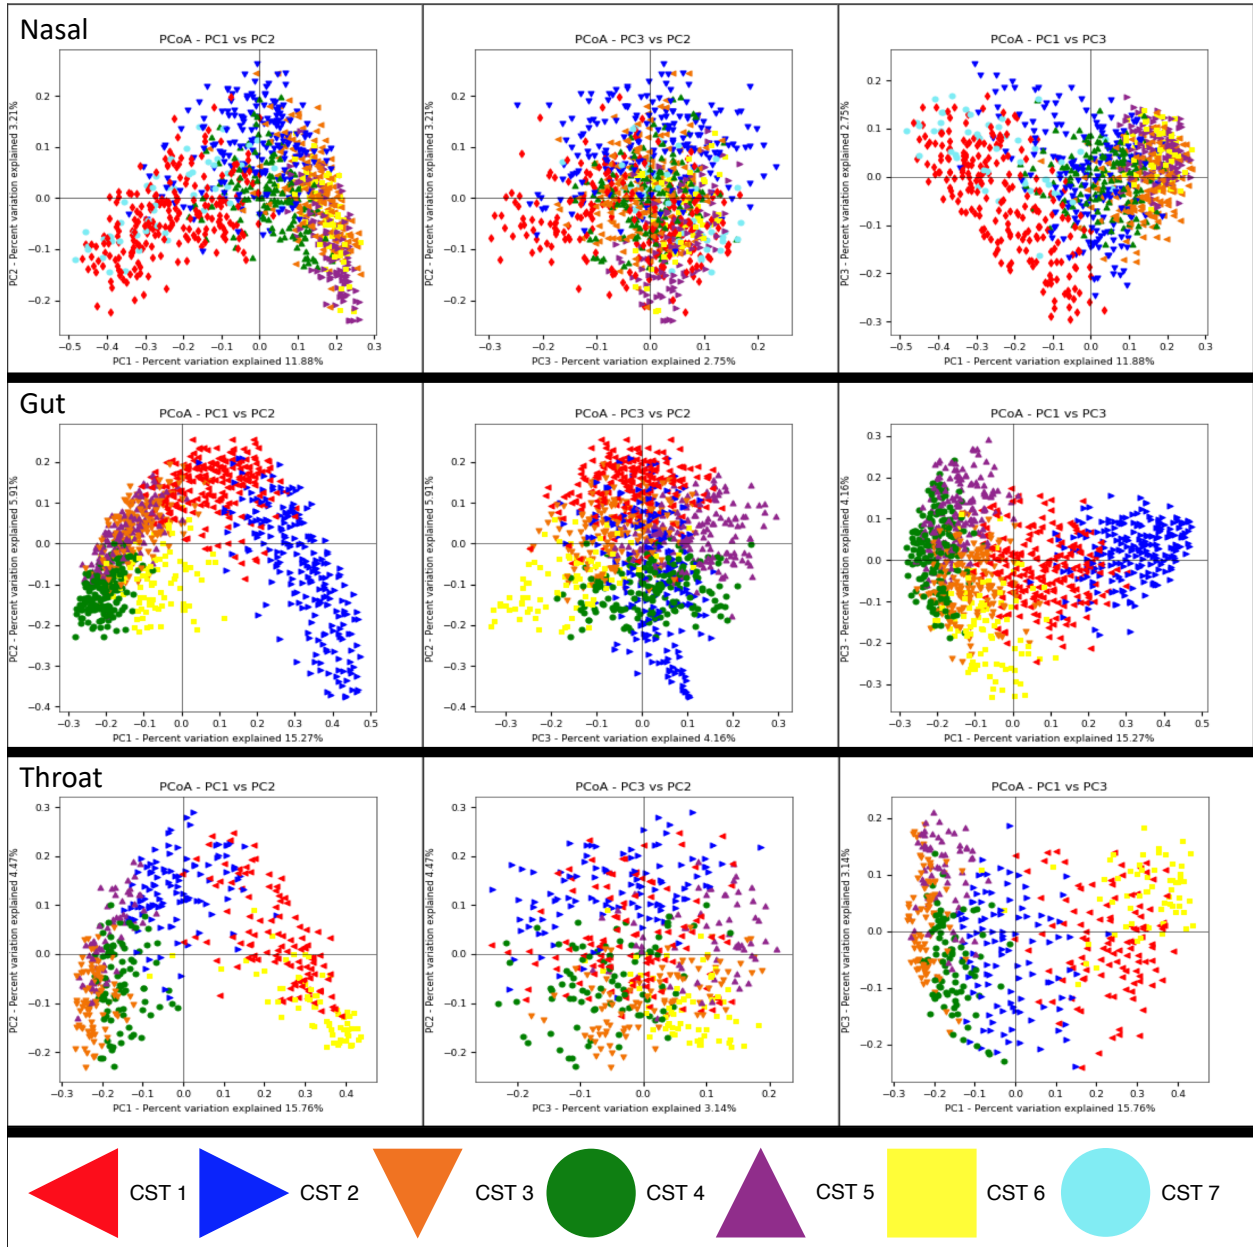

**Supplemental Figure 1. Unweighted Unifrac principal coordinate analysis plots of all samples from each body site, colored by the community state type of the sample.**
