# Supplementary material for: Neonatal gut and respiratory microbiota: coordinated development through time and space
Source: Springer Nature journal article supplement (doi:10.1186/s40168-018-0566-5), 2018-10-26
Supplement: 40168_2018_566_MOESM3_ESM.pdf [file 40168_2018_566_MOESM3_ESM.pdf]

### Supplemental Figure 3

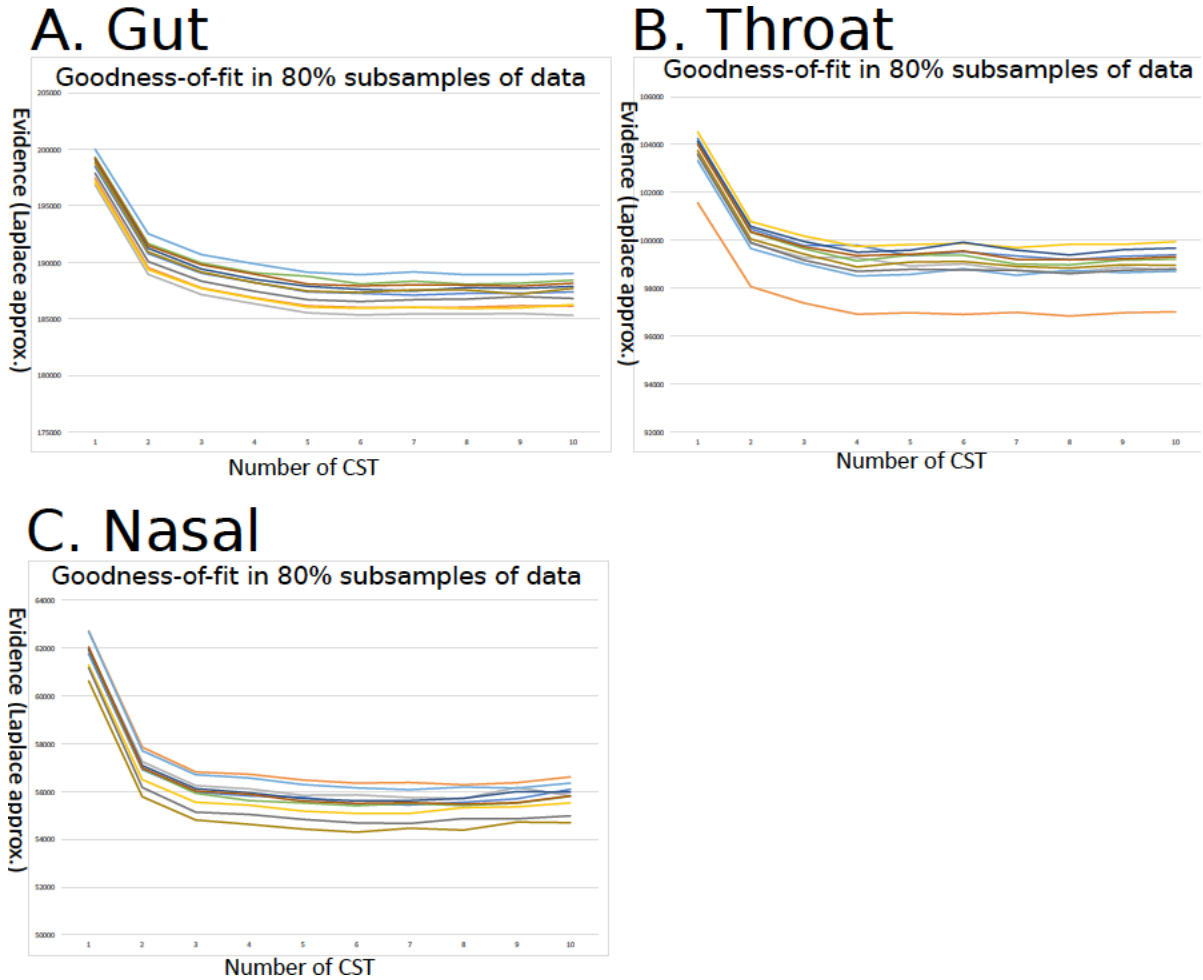

**Supplemental Figure 3. Goodness of fit for Dirichlet multinomial mixture models in 80% subsamples of data in gut (A), throat (B) and nasal (C).** A series of models that included from 1 to 10 Dirichlet-multinomial components were fit 10 times to datasets subsampled without replacement. The Laplace approximation to the Bayesian evidence was calculated for each subsample.
