# Supplementary material for: Neonatal gut and respiratory microbiota: coordinated development through time and space
Source: Springer Nature journal article supplement (doi:10.1186/s40168-018-0566-5), 2018-10-26
Supplement: 40168_2018_566_MOESM5_ESM.pdf [file 40168_2018_566_MOESM5_ESM.pdf]

# Supplemental Figure 4

A

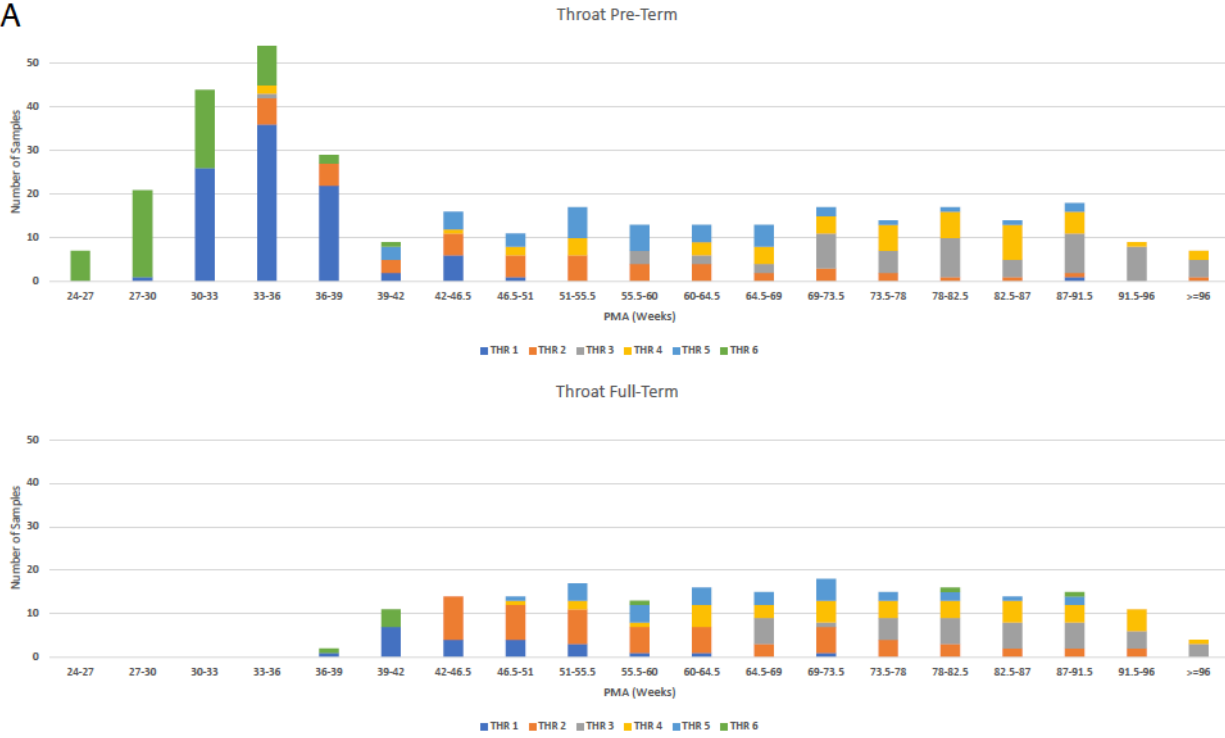

B

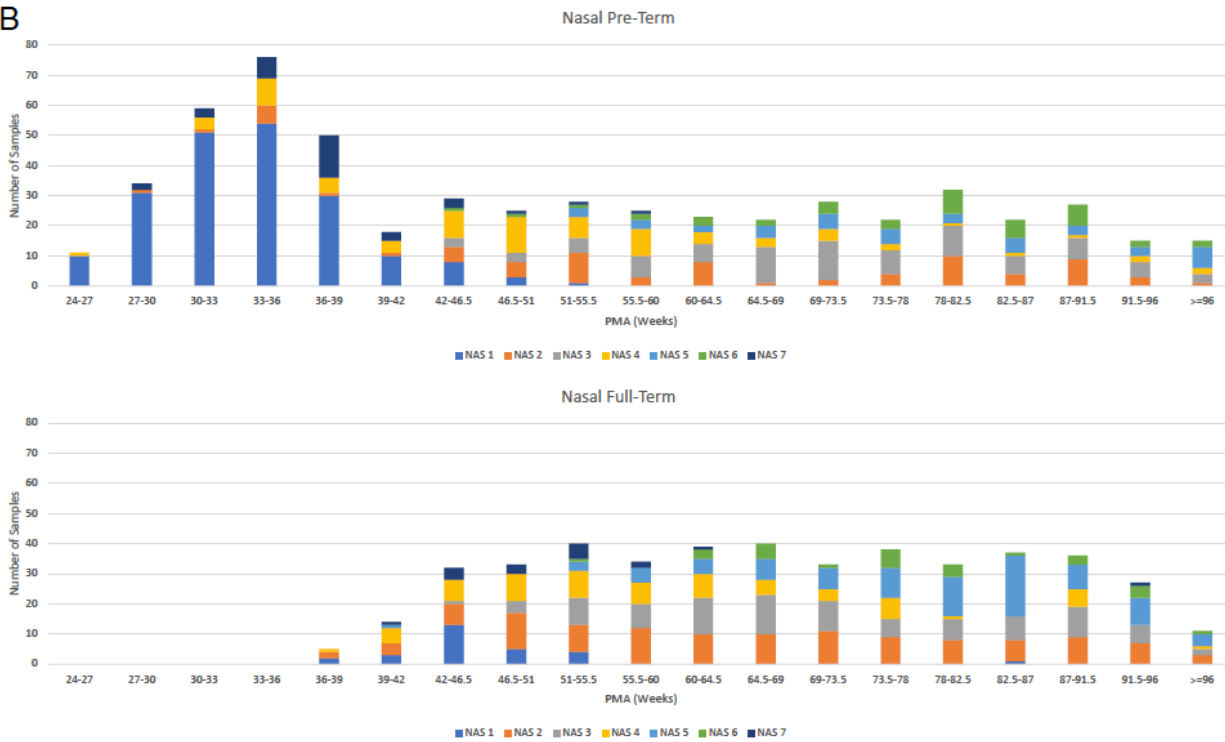

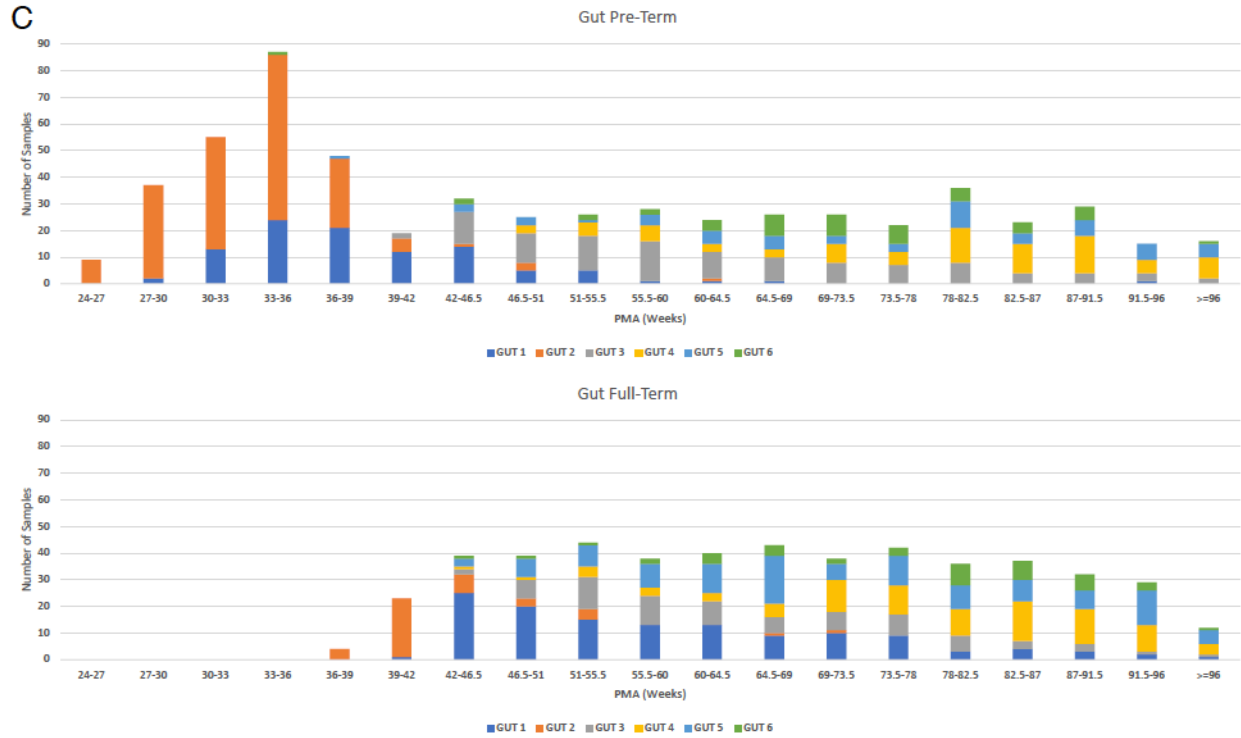

**Supplemental Figure 4. Distribution of samples into community state types by PMA for (A) throat, (B) nasal and (C) gut for pre-term and full-term infants.**
