# Supplementary material for: Neonatal gut and respiratory microbiota: coordinated development through time and space
Source: Springer Nature journal article supplement (doi:10.1186/s40168-018-0566-5), 2018-10-26
Supplement: 40168_2018_566_MOESM7_ESM.pdf [file 40168_2018_566_MOESM7_ESM.pdf]

## Supplemental Figure 6



**Supplemental Figure 6. Associations between CST membership and post-menstrual age.** The posterior probability of membership to each CST (y-axis) is plotted over PMA (x-axis), as estimated as a non-parametric function of PMA and gestational age at birth. The CST are sorted by the post-menstrual age at which they achieve maximal probability of occurrence.
