# Supplementary material for: Neonatal gut and respiratory microbiota: coordinated development through time and space
Source: Springer Nature journal article supplement (doi:10.1186/s40168-018-0566-5), 2018-10-26
Supplement: 40168_2018_566_MOESM10_ESM.pdf [file 40168_2018_566_MOESM10_ESM.pdf]

## Supplemental Figure 8

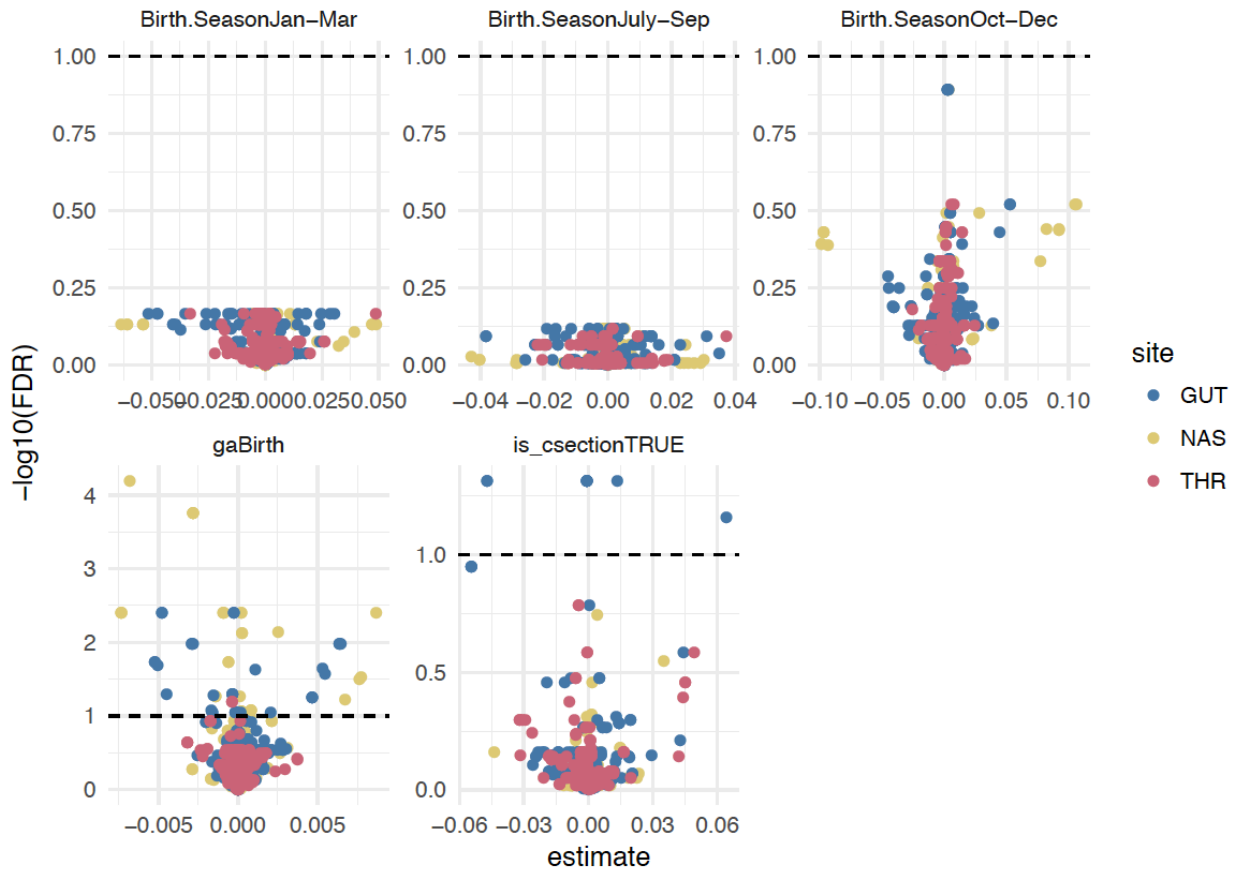

**Supplemental Figure 8. Coefficients versus p-values for models that test OTU for associations with subject-level covariates.** The taxa OTU regressions (see Methods “CST and Taxa regression”) included baseline models that contained the covariates *mode of delivery* (c-section vs vaginal delivery), *gestational age at birth* (gaBirth), and *birth season* as covariates. Coefficient estimates are shown versus the  $-\log_{10}$  false discovery rate adjusted p-values, adjusted jointly across all sites, coefficients and taxonomic levels.
