# Supplementary material for: Neonatal gut and respiratory microbiota: coordinated development through time and space
Source: PubMed Central journal article supplement (PMC6204011; doi:10.1186/s40168-018-0566-5), 2018-10-26
Supplement: 40168_2018_566_MOESM13_ESM.pdf [file 40168_2018_566_MOESM13_ESM.pdf]

## Supplemental Figure 9

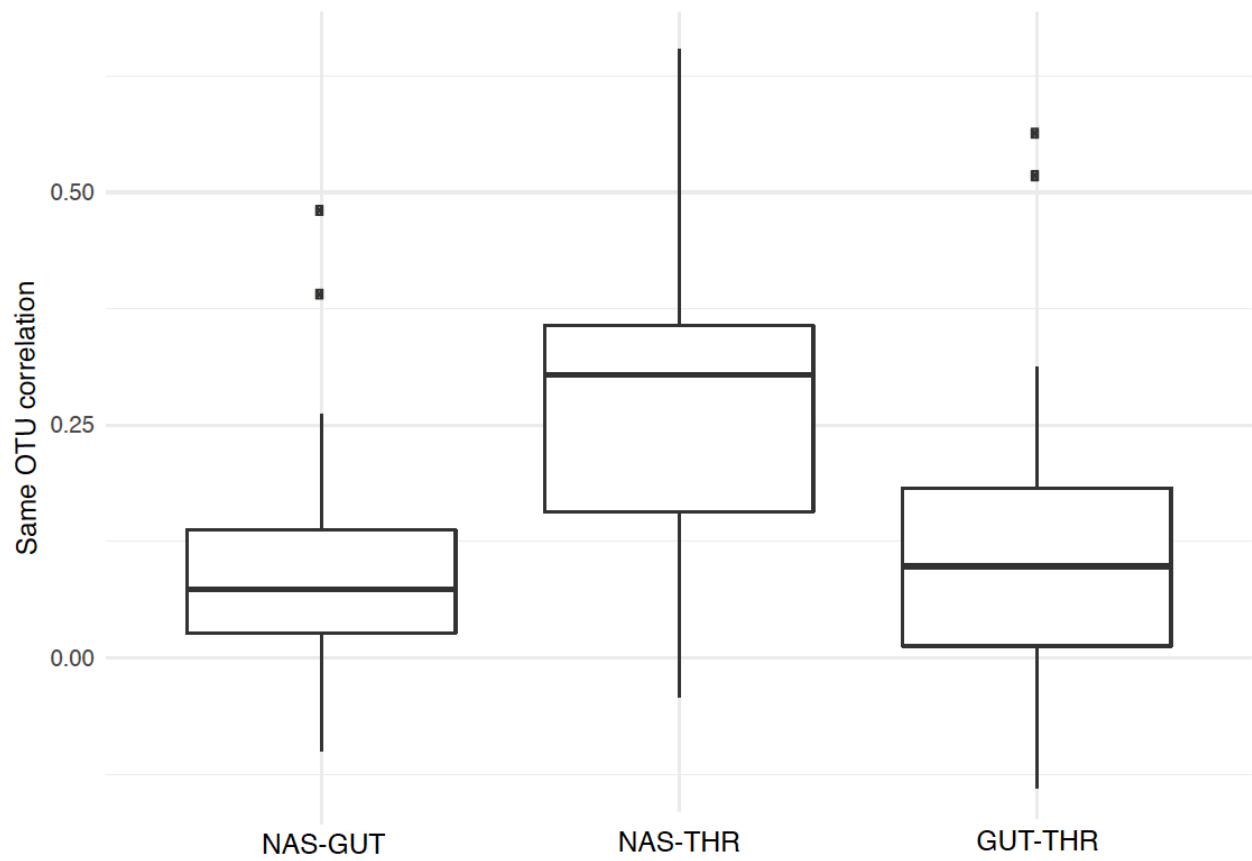

**Supplemental Figure 9. Distribution of correlations of OTU shared in common between body sites.** PMA and a subject-level intercept are regressed out before calculating the Pearson sample correlation of each matched OTU.
