# Supplementary material for: Neonatal gut and respiratory microbiota: coordinated development through time and space
Source: Springer Nature journal article supplement (doi:10.1186/s40168-018-0566-5), 2018-10-26
Supplement: 40168_2018_566_MOESM14_ESM.pdf [file 40168_2018_566_MOESM14_ESM.pdf]

### Supplemental Figure 10

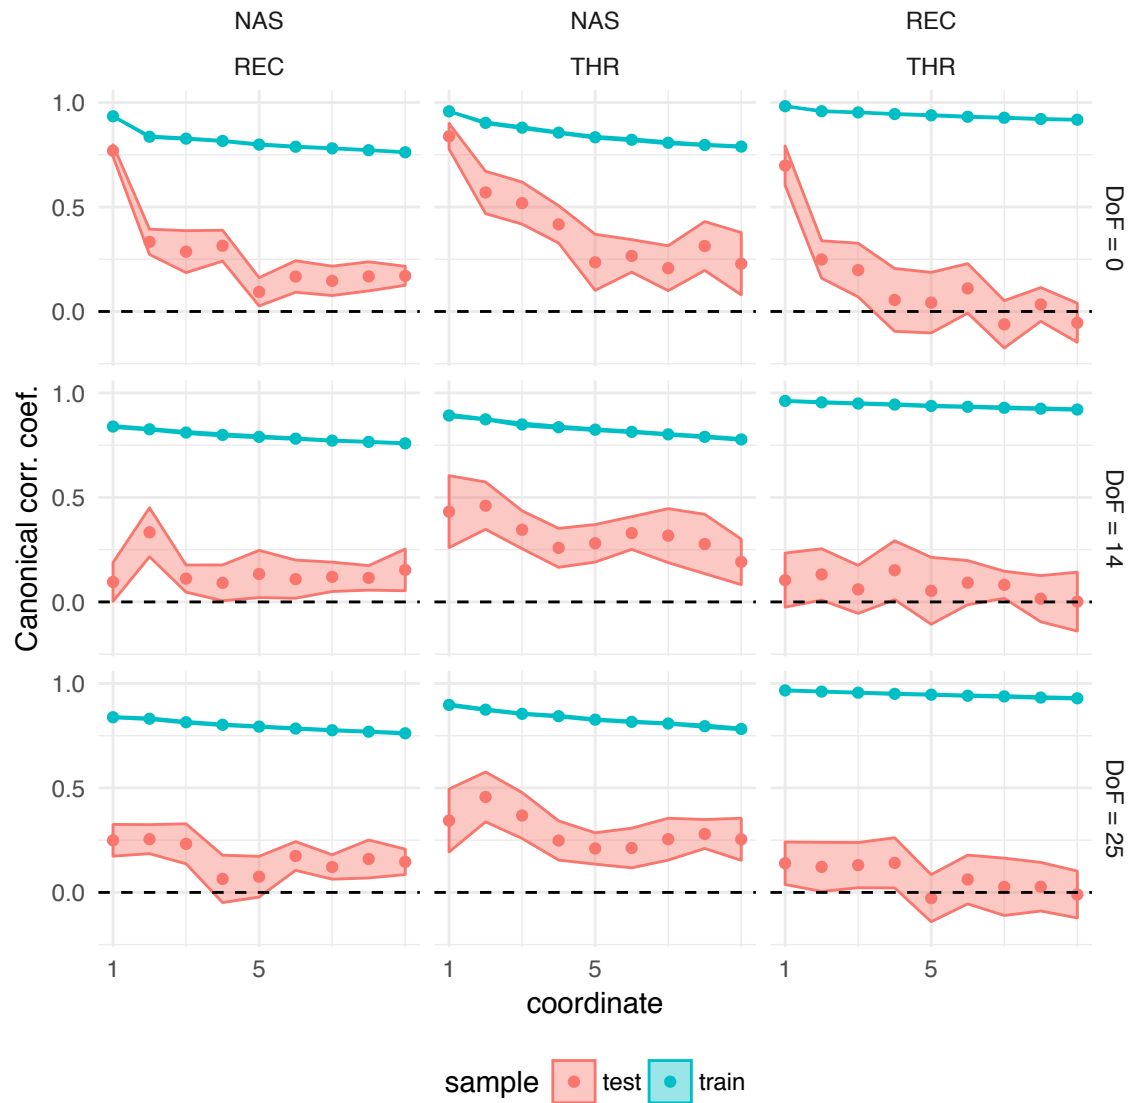

**Supplemental Figure 10. Canonical correlations between body sites.** 10-fold cross-validation allowed unbiased evaluation of the correlation (y-axis) in the first ten subspaces (x-axis) in held-out data (red) and the training data (blue). The correlation is attenuated after adjusting for PMA with a 14 and 25 degree-of-freedom natural spline. The 2 times the standard error of the mean of the cross-validation shows the sampling variability of the correlations.
